# Supplementary material for: A novel “turn-off” photoelectrochemical aptasensing platform for selective detection of tobramycin based on the Ti3C2–MoS2/BiOI heterojunction
Source: Royal Society of Chemistry journal article supplement (doi:10.1039/d3ra04800d), 2023-01-01
Supplement: d3ra04800d1.pdf [file d3ra04800d1.pdf]

**A novel “turn-off” photoelectrochemical aptasensing platform for selective detection of tobramycin based on  $\text{Ti}_3\text{C}_2\text{-MoS}_2/\text{BiOI}$  heterojunction**

Xuejun Qi<sup>a,\*</sup>, Xing Zhao<sup>a</sup>

<sup>a</sup> School of Architecture and Civil Engineering, Xihua University, Chengdu 610039, PR China

\* Corresponding author. E-mail address: [xuejunqi@hotmail.com](mailto:xuejunqi@hotmail.com) (Xuejun Qi).

## **Experimental**

### **Materials and reagents**

All reagents were of analytical grade and used without further purification.  $\text{Bi}(\text{NO}_3)_3 \cdot 5\text{H}_2\text{O}$ ,  $(\text{NH}_4)_6\text{Mo}_{24} \cdot 4\text{H}_2\text{O}$  and  $\text{SC}(\text{NH}_2)_2$ , KI, ethanol, ethylene glycol (EG) were purchased from Sinopharm Chemical Reagent Co., Ltd ([www.sinoreagent.com](http://www.sinoreagent.com)). TOB aptamer probes were ordered from Shanghai Sangon Biotech Co., Ltd. (Shanghai, China). The sequence of the TOB aptamer is 5'-GGG ACT TGG TTT AGG TAA TGA GTCCC-3'. Phosphate buffered solution (PBS, 0.1 M) were prepared by mixing stock standard solutions of  $\text{NaH}_2\text{PO}_4$  and  $\text{Na}_2\text{HPO}_4$ . Ultra-pure water ( $18.25 \text{ M}\Omega \cdot \text{cm}$ ) is utilized through all the experiments.

### **Apparatus**

Bruker D8 Advance diffractometer was used to conduct the X-ray diffraction (XRD) under the  $\text{Cu K}\alpha$  irradiation. And the ESCALAB 250Xi was used to conduct the X-ray photoelectron spectroscopy (XPS). UV-visible (UV-vis) spectrophotometer, an instrument for collecting the materials' Diffuse reflection spectra (DRS), was operated with the help of  $\text{BaSO}_4$  as reference. And finally, scanning electron microscopy (SEM) and transmission electron microscopy (TEM) are two methods for characterizing the form of different specimens.

### **Preparation of materials**

Preparation of  $\text{Ti}_3\text{C}_2$ : 2 g of as-purchased  $\text{Ti}_3\text{AlC}_2$  powders were slowly immersed in 40 mL HF and stirred for 48 h to remove Al layer for obtaining  $\text{Ti}_3\text{C}_2$ . The mixture was centrifuged and washed with deionized water several times until the  $\text{pH} \geq 6$ , then dried at  $80 \text{ }^\circ\text{C}$ . Then, pristine  $\text{Ti}_3\text{C}_2$  was intercalated by 30 mL dimethyl sulfoxide (DMSO). The mixture was continuously agitated for 18 h. Thereafter, the mixture underwent sonication for 1 h, and then centrifuged and dried at  $80 \text{ }^\circ\text{C}$ .

Preparation of MoS<sub>2</sub>: (NH<sub>4</sub>)<sub>6</sub>Mo<sub>24</sub>·4H<sub>2</sub>O and SC(NH<sub>2</sub>)<sub>2</sub> were dissolved in deionized water under stirring. Then, they were transferred to a 100 mL Teflon-lined stainless steel autoclave, and heated at 200 °C for 24 h.

Preparation of Ti<sub>3</sub>C<sub>2</sub>-MoS<sub>2</sub>/BiOI heterojunction: Appropriate KI is dissolved in H<sub>2</sub>O solution. Then, an appropriate Bi(NO<sub>3</sub>)<sub>3</sub>·5H<sub>2</sub>O and the synthesized MoS<sub>2</sub>, Ti<sub>3</sub>C<sub>2</sub> are slowly added to the suspension obtained above and continuously stirred for half an hour. The mixed solution was heated at 180 °C for 24 h in 100 mL Teflon-lined autoclave. Finally, the product is continually washed three times together with deionized water and ethanol, and then dried at 60 °C for 12 h. MoS<sub>2</sub>/BiOI-6% was prepared without adding the Ti<sub>3</sub>C<sub>2</sub> by the above process.

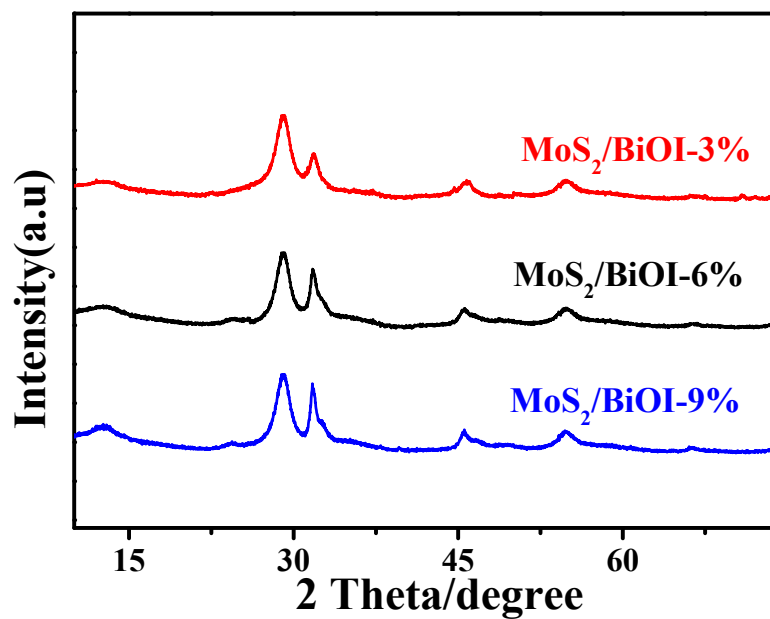

Figure S1. XRD spectrum of MoS<sub>2</sub>/BiOI-3%, MoS<sub>2</sub>/BiOI-6% and MoS<sub>2</sub>/BiOI-9% composites.

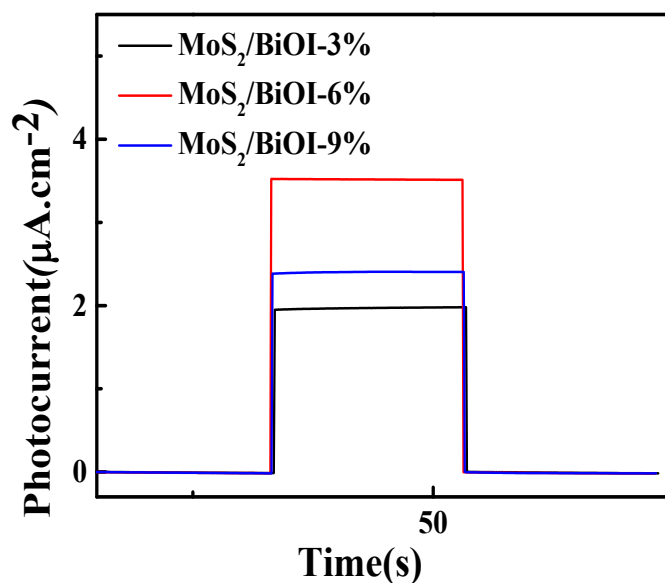

Figure S2 Photocurrent responses of the MoS<sub>2</sub>/BiOI-X composites in 0.1 M PBS.

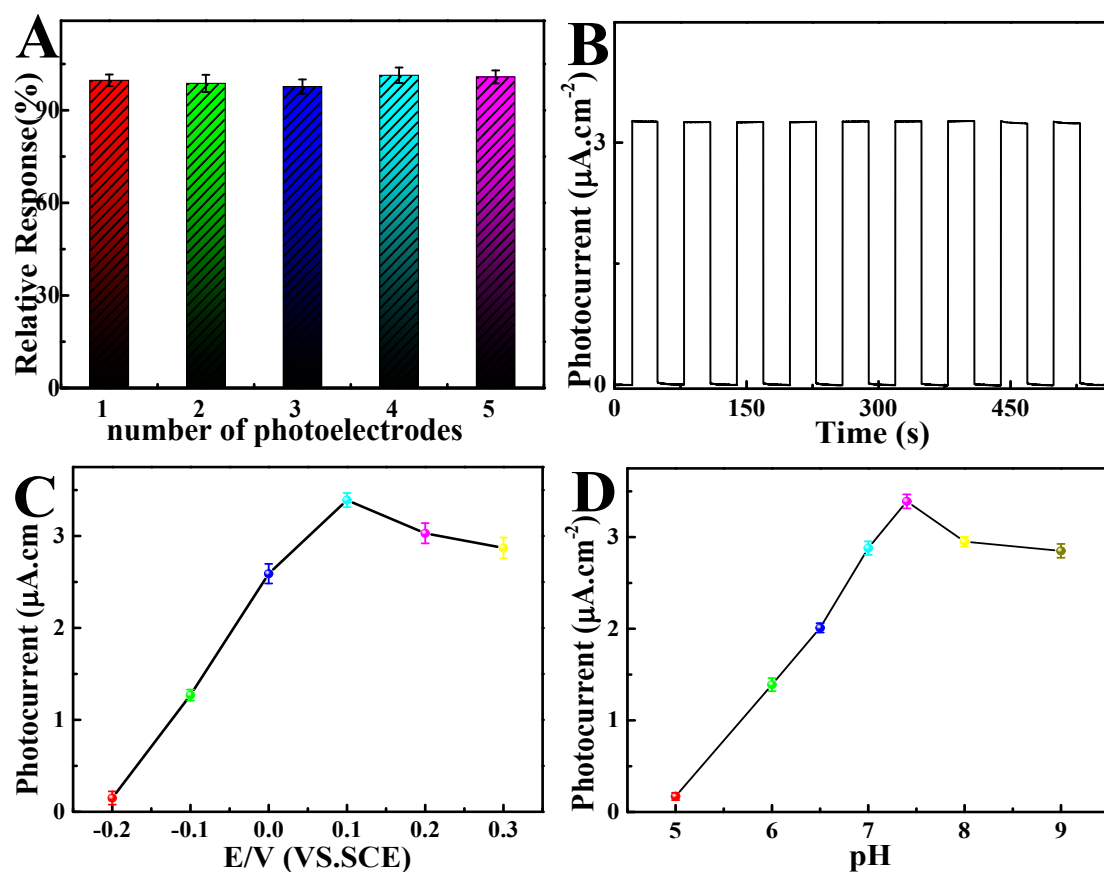

**Figure S3.** (C) repeatability and (D) stability of the PEC aptasensor based on aptamer/ $\text{Ti}_3\text{C}_2\text{-MoS}_2/\text{BiOI-6\%}$  for TOB detection; Influence of different reaction parameters on the photocurrent response of the electrode. (C) the bias potentials, (D) different pH values in 0.1 M PBS containing 0.1 M AA.

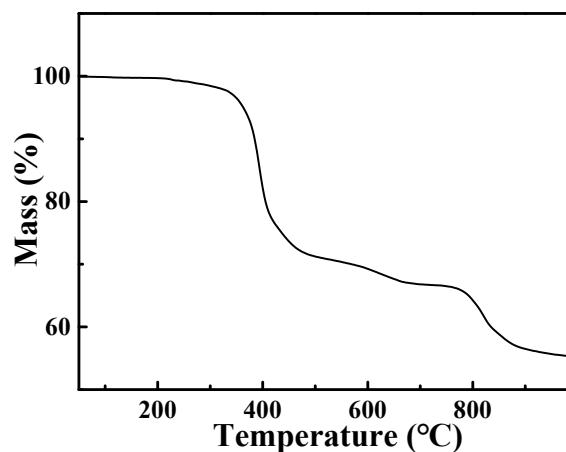

**Figure S4** TGA of  $\text{Ti}_3\text{C}_2\text{-MoS}_2/\text{BiOI-6\%}$ .

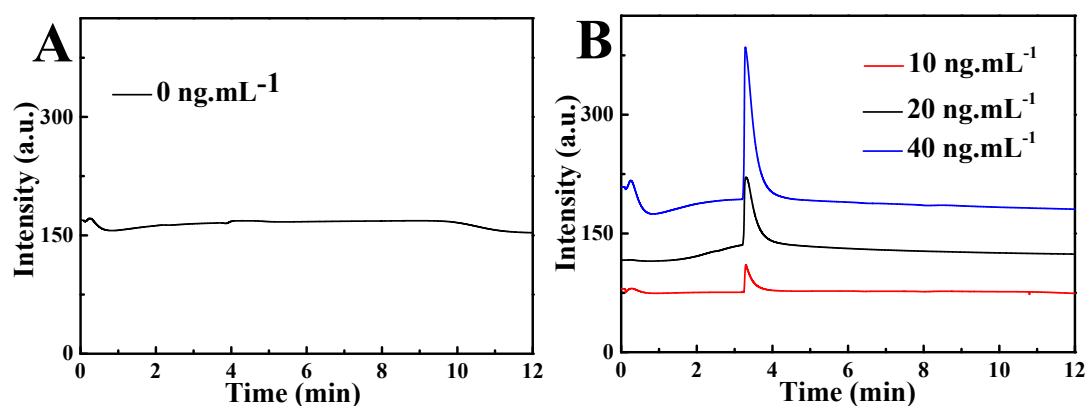

**Figure S5** LC-MS for TOB.

**Table S1 Comparison of different methods for detecting TOB. LOD: limit of detection.**

| Method                         | Linear Range<br>( $\text{ng.mL}^{-1}$ ) | LOD                       | Ref. |
|--------------------------------|-----------------------------------------|---------------------------|------|
| Electrochemical                | 0.01-5                                  | $6.79 \text{ pg.mL}^{-1}$ | 1    |
| PEC aptasensor                 | 0.005-5                                 | $2 \text{ pg.mL}^{-1}$    | 2    |
| Quartz crystal<br>microbalance | 0.036-0.315                             | $12 \text{ pg.mL}^{-1}$   | 3    |
| PEC aptasensor                 | 10.5-105                                | $8.99 \text{ ng.mL}^{-1}$ | 4    |

PEC aptasensor

0.001-40

0.5  $\text{pg.mL}^{-1}$

This work

---

## Reference

1. M. Wang, B. Hu, C. Yang, Z. Zhang, L. He and S. Fang, Electrochemical biosensing based on protein-directed carbon nanospheres embedded with SnO<sub>x</sub> and TiO<sub>2</sub> nanocrystals for sensitive detection of tobramycin, *Biosens. Bioelectron.*, 2018, **99**, 176-185.
2. L. Qiao, Y. Zhu, T. J. Zeng, Y. Y. Zhang, M. J. Zhang, K. X. Song, N. Yin, Y. N. Tao, Y. Zhao, Y. Zhang and C. Zhang, "Turn-off" photoelectrochemical aptasensor based on g-C<sub>3</sub>N<sub>4</sub>/WC/WO<sub>3</sub> composites for tobramycin detection, *Food Chem.*, 2023, **403**, 134287.
3. M. L. Yola, L. Uzun, N. Ozaltin and A. Denizli, Development of molecular imprinted nanosensor for determination of tobramycin in pharmaceuticals and foods, *Talanta*, 2014, **120**, 318–324.
4. X. Liu, Y. Jiang, J. Luo, X. Guo, Y. Ying, Y. Wen and Y. Wu, A SnO<sub>2</sub>/Bi<sub>2</sub>S<sub>3</sub>-based photoelectrochemical aptasensor for sensitive detection of tobramycin in milk, *Food Chem.*, 2021, **344**, 128716.
